# Supplementary material for: ABO Blood Group in Relation to COVID-19 Susceptibility and Clinical Outcomes: A Retrospective Observational Study in the United Arab Emirates
Source: MDPI journal article supplement (doi:10.3390/life12081157), 2022-07-29
Supplement: s1 [file s1]

**Supplementary Table S1:** Comparative Analysis for Laboratory Findings between Blood Groups among Inpatients

| Laboratory findings                         |              | "A group"     | "AB group"     | "B group"     | "O group"     | P value |
|---------------------------------------------|--------------|---------------|----------------|---------------|---------------|---------|
| White Blood Cells Count ( $\times 10^9/L$ ) | Median (IQR) | 7.0 (3.4)     | 6.6 (2.9)      | 6.4 (2.0)     | 6.7 (2.6)     | 0.9403  |
| Hemoglobin (g/L)                            | Median (IQR) | 13.2 (2.0)    | 13.8 (1.4)     | 14.5 (2.3)    | 14.2 (2.8)    | 0.1564  |
| Platelets ( $\times 10^9/L$ )               | Median (IQR) | 304.0 (215.0) | 233.5 (73.5)   | 287.0 (121.0) | 271.0 (131.5) | 0.05483 |
| C-Reactive Protein (mg/L)                   | Median (IQR) | 55.0 (105.0)  | 44.5 (78.8)    | 12.5 (60.8)   | 14.0 (68.2)   | 0.1064  |
| D-dIMER ( $\mu g/mL$ )                      | Median (IQR) | 0.6 (1.8)     | 0.4 (0.5)      | 0.3 (0.7)     | 0.5 (0.8)     | 0.2781  |
| Lactate Dehydrogenase (U/L)                 | Median (IQR) | 299.0 (294.0) | 297.0 (274.0)  | 260.0 (207.0) | 227.0 (148.8) | 0.1435  |
| Alanine Aminotransferase (U/L)              | Median (IQR) | 33.0 (24.7)   | 45.0 (21.8)    | 35.0 (40.0)   | 41.0 (37.5)   | 0.5312  |
| Aspartate Aminotransferase (U/L)            | Median (IQR) | 39.0 (31.0)   | 55.0 (46.0)    | 37.0 (30.0)   | 36.0 (19.5)   | 0.4645  |
| Creatinine (mg/dL)                          | Median (IQR) | 0.8 (0.3)     | 1.1 (0.2)      | 0.8 (0.3)     | 0.9 (0.3)     | 0.01998 |
| Neutrophil.Count (%)                        | Median (IQR) | 64.6 (29.9)   | 61.5 (16.0)    | 57.2 (20.1)   | 59.8 (19.1)   | 0.896   |
| Lymphocyte.Count (%)                        | Median (IQR) | 24.8 (22.5)   | 27.9 (15.6)    | 31.7 (17.7)   | 28.6 (17.3)   | 0.8619  |
| Neutrophil to Lymphocyte Ratio              | Median (IQR) | 2.5 (3.7)     | 2.2 (3.0)      | 1.6 (2.3)     | 2.1 (2.3)     | 0.8518  |
| Red Cell Distribution Width.CV (%)          | Median (IQR) | 12.9 (1.0)    | 13.8 (1.3)     | 12.8 (1.0)    | 13.1 (1.0)    | 0.247   |
| Fibrinogen (mg/dL)                          | Median (IQR) | 628.0 (420.0) | 494.0 (259.8)  | 513.5 (274.0) | 467.0 (264.2) | 0.5123  |
| Ferritin (ng/mL)                            | Median (IQR) | 365.0 (875.5) | 473.5 (1809.6) | 430.7 (556.8) | 273.4 (652.0) | 0.4573  |
| Prothrombin Time (sec)                      | Median (IQR) | 14.0 (2.0)    | 13.0 (0.5)     | 14.0 (1.0)    | 13.8 (1.6)    | 0.2592  |
| International Normalized Ratio              | Median (IQR) | 1.0 (0.1)     | 1.0 (0.1)      | 1.0 (0.2)     | 1.0 (0.1)     | 0.4733  |
| Troponin.I (ng/ml)                          | Median (IQR) | 0.0 (0.0)     | 0.0 (0.0)      | 0.0 (0.0)     | 0.0 (0.0)     | 0.4212  |
| Procalcitonin (ng/mL)                       | Median (IQR) | 0.1 (0.2)     | 0.1 (0.3)      | 0.1 (0.0)     | 0.1 (0.1)     | 0.8754  |
| Glucose (Mmol/L)                            | Median (IQR) | 6.0 (3.5)     | 8.9 (8.0)      | 5.8 (1.5)     | 5.4 (3.0)     | 0.5764  |
